# Supplementary material for: Causes of Death in a Contemporary Cohort of Patients With Type 2 Diabetes and Atherosclerotic Cardiovascular Disease: Insights From the TECOS Trial
Source: Oxford University Press journal article supplement (doi:10.2337/dc17-1091), 2017-10-06
Supplement: dc171091supplementarydata.pdf [file dc171091supplementarydata.pdf]

# SUPPLEMENTARY DATA

**Supplementary Table 1. Adjudication definitions of mortality**

| Cause of death              | Definition                                                                                                                                                                                                                                                                                                                                                                                                                                                                                                                                                                                                                                                                                                                                                                                                                                                                                                                                                                                                                                                                                                                                                                                                                                   |
|-----------------------------|----------------------------------------------------------------------------------------------------------------------------------------------------------------------------------------------------------------------------------------------------------------------------------------------------------------------------------------------------------------------------------------------------------------------------------------------------------------------------------------------------------------------------------------------------------------------------------------------------------------------------------------------------------------------------------------------------------------------------------------------------------------------------------------------------------------------------------------------------------------------------------------------------------------------------------------------------------------------------------------------------------------------------------------------------------------------------------------------------------------------------------------------------------------------------------------------------------------------------------------------|
| <b>Cardiovascular</b>       |                                                                                                                                                                                                                                                                                                                                                                                                                                                                                                                                                                                                                                                                                                                                                                                                                                                                                                                                                                                                                                                                                                                                                                                                                                              |
| Sudden cardiac death        | <p>This refers to death that occurs unexpectedly in a previously stable patient and will include the following deaths:</p> <ul style="list-style-type: none"> <li>i. Witnessed and instantaneous without new or worsening symptoms and also in the absence of progressive circulatory failure, the latter lasting for 60 minutes or more.</li> <li>ii. Witnessed within 60 minutes of the onset of new or worsening symptoms unless a cause other than cardiac is obvious.</li> <li>iii. Witnessed and attributed to an identified arrhythmia (e.g. captured on an ECG recording or witnessed on a monitor by either a medic or paramedic).</li> <li>iv. Patients resuscitated from cardiac arrest in the absence of pre-existing circulatory failure or other causes of death, including myocardial infarction, and who die within 24 hours or without gaining consciousness; similar patients who die during an attempted resuscitation.</li> <li>v. Unwitnessed death in the absence of pre-existing progressive circulatory failure or other causes of death (information regarding the patient's clinical status within the week preceding death should be present or the "presumed CV death" classification should be used)</li> </ul> |
| Myocardial infarction death | <p>Death occurring up to 7 days after a documented acute myocardial infarction (verified either by the diagnostic criteria outlined above for acute myocardial infarction or by autopsy findings showing recent myocardial infarction or recent coronary thrombus) and where there is no conclusive evidence of another cause of death.</p> <p>NOTE: If death occurs before biochemical confirmation of myocardial necrosis can be obtained, the CECC will adjudicate based on clinical presentation and ECG evidence.</p> <p>Death due to a myocardial infarction that occurs as a direct consequence of a cardiovascular investigation/procedure/operation will be classified as death due to other cardiovascular cause (see definition for death due to other cardiovascular cause, below).</p>                                                                                                                                                                                                                                                                                                                                                                                                                                          |
| Congestive heart failure    | <p>Death occurring in the context of clinically worsening symptoms and/or signs of heart failure without evidence of another cause of death:</p> <p>Any of the following:</p> <ul style="list-style-type: none"> <li>i. New or increasing symptoms and/or signs of heart failure requiring the initiation of, or an increase in, treatment directed at heart failure or occurring in a patient already receiving maximal therapy for heart failure.</li> <li>ii. Heart failure symptoms or signs requiring continuous intravenous therapy or oxygen administration.</li> </ul>                                                                                                                                                                                                                                                                                                                                                                                                                                                                                                                                                                                                                                                               |

# SUPPLEMENTARY DATA

|                                          |                                                                                                                                                                                                                                                                                                                                                                                                                                                                                                                                                                                                                                                                                                                                                               |
|------------------------------------------|---------------------------------------------------------------------------------------------------------------------------------------------------------------------------------------------------------------------------------------------------------------------------------------------------------------------------------------------------------------------------------------------------------------------------------------------------------------------------------------------------------------------------------------------------------------------------------------------------------------------------------------------------------------------------------------------------------------------------------------------------------------|
|                                          | <p>iii. Confinement to bed but only if this is due entirely to heart failure symptoms.</p> <p>iv. Pulmonary oedema sufficient to cause tachypnoea and distress not occurring in the context of an acute myocardial infarction or as the consequence of an arrhythmia occurring in the absence of worsening heart failure.</p> <p>v. Cardiogenic shock (defined as hypotension resulting in failure to maintain normal renal or cerebral function for &gt; 60 minutes prior to death) not occurring in the context of an acute myocardial infarction or as the consequence of an arrhythmia occurring in the absence of worsening heart failure.</p> <p>This category will include sudden death occurring during an admission for worsening heart failure.</p> |
| Stroke                                   | Death occurring within 30 days of a confirmed stroke                                                                                                                                                                                                                                                                                                                                                                                                                                                                                                                                                                                                                                                                                                          |
| Other cardiovascular cause               | Death must be due to a fully documented cardiovascular cause not included above (e.g. ruptured aortic aneurysm, pulmonary embolism, or cardiovascular intervention).                                                                                                                                                                                                                                                                                                                                                                                                                                                                                                                                                                                          |
| Presumed cardiovascular death            | All deaths not attributed to the above categories of cardiovascular death and not attributed to a non-cardiovascular cause.                                                                                                                                                                                                                                                                                                                                                                                                                                                                                                                                                                                                                                   |
| Death from unknown cause                 | A case will be classified as “unknown” if the circumstances of death are totally unknown and assessment of a cardiovascular or non-cardiovascular cause is not possible. All unknown deaths will be considered to be cardiovascular deaths.                                                                                                                                                                                                                                                                                                                                                                                                                                                                                                                   |
| <b>Non-cardiovascular cause of death</b> | A death will be considered non-cardiovascular only if an unequivocal and documented non-cardiovascular cause can be established. This category includes deaths related to non-cardiovascular procedures.                                                                                                                                                                                                                                                                                                                                                                                                                                                                                                                                                      |

**Supplementary Table 2. Baseline demographics by death status**

| Characteristic         | Survivors<br>(N=13587) | Cardiovascular<br>Death<br>(N=530) | Non-Cardiovascular<br>Death<br>(N=338) | Unknown<br>Cause<br>(N=216) | P-value |
|------------------------|------------------------|------------------------------------|----------------------------------------|-----------------------------|---------|
| <b>Demographics</b>    |                        |                                    |                                        |                             |         |
| Age, years             | 65 (59, 71)            | 68 (62, 75)                        | 70 (65, 76)                            | 70 (62, 76)                 | <0.001  |
| Female                 | 4018 (29.6%)           | 140 (26.4%)                        | 80 (23.7%)                             | 59 (27.3%)                  | 0.042   |
| Race groups            |                        |                                    |                                        |                             | <0.001  |
| White                  | 9221 (67.9%)           | 343 (64.7%)                        | 252 (74.6%)                            | 141 (65.3%)                 |         |
| Black                  | 423 (3.1%)             | 12 (2.3%)                          | 6 (1.8%)                               | 6 (2.8%)                    |         |
| Asian                  | 3058 (22.5%)           | 114 (21.5%)                        | 47 (13.9%)                             | 46 (21.3%)                  |         |
| Other                  | 885 (6.5%)             | 61 (11.5%)                         | 33 (9.8%)                              | 23 (10.6%)                  |         |
| Not Hispanic or Latino | 11944 (87.9%)          | 457 (86.2%)                        | 285 (84.3%)                            | 187 (86.6%)                 | 0.143   |
| Hispanic or Latino     | 1643 (12.1%)           | 73 (13.8%)                         | 53 (15.7%)                             | 29 (13.4%)                  | 0.143   |
| Region                 |                        |                                    |                                        |                             | <0.001  |
| Latin America          | 1336 (9.8%)            | 68 (12.8%)                         | 46 (13.6%)                             | 21 (9.7%)                   |         |
| Asia Pacific/Other     | 4267 (31.4%)           | 160 (30.2%)                        | 76 (22.5%)                             | 62 (28.7%)                  |         |
| Western Europe         | 1938 (14.3%)           | 55 (10.4%)                         | 61 (18.0%)                             | 22 (10.2%)                  |         |
| Eastern Europe         | 3638 (26.8%)           | 173 (32.6%)                        | 80 (23.7%)                             | 74 (34.3%)                  |         |
| North America          | 2408 (17.7%)           | 74 (14.0%)                         | 75 (22.2%)                             | 37 (17.1%)                  |         |

# SUPPLEMENTARY DATA

| Characteristic                               | Survivors<br>(N=13587) | Cardiovascular<br>Death<br>(N=530) | Non-Cardiovascular<br>Death<br>(N=338) | Unknown<br>Cause<br>(N=216) | P-value |
|----------------------------------------------|------------------------|------------------------------------|----------------------------------------|-----------------------------|---------|
| <b>Medical History and Baseline Labs</b>     |                        |                                    |                                        |                             |         |
| Duration of diabetes, years                  | 10.0 (5.0, 16.0)       | 11.0 (6.0, 17.0)                   | 12.0 (6.0, 20.0)                       | 11.0 (6.0, 18.5)            | <0.001  |
| Qualifying HbA1c %                           | 7.2 (6.8, 7.6)         | 7.3 (6.8, 7.7)                     | 7.2 (6.9, 7.6)                         | 7.3 (6.8, 7.8)              | 0.140   |
| Qualifying HbA1c (mmol/mol)                  | 55 (51, 60)            | 56 (51, 61)                        | 55 (52, 60)                            | 56 (51, 61)                 | -       |
| Baseline HbA1c %                             | 7.2 (6.8, 7.7)         | 7.3 (6.8, 7.8)                     | 7.2 (6.8, 7.7)                         | 7.3 (6.8, 7.8)              | 0.024   |
| Baseline HbA1c (mmol/mol)                    | 55 (51, 61)            | 56 (51, 62)                        | 55 (51, 61)                            | 56 (51, 62)                 | -       |
| Qualifying HbA1c categories                  |                        |                                    |                                        |                             | 0.063   |
| <7%                                          | 4453 (33.8%)           | 169 (32.4%)                        | 105 (31.8%)                            | 73 (34.3%)                  |         |
| 7–7.5%                                       | 4088 (31.0%)           | 138 (26.4%)                        | 104 (31.5%)                            | 56 (26.3%)                  |         |
| ≥7.5%                                        | 4626 (35.1%)           | 215 (41.2%)                        | 121 (36.7%)                            | 84 (39.4%)                  |         |
| eGFR, mL/min/1.73 m <sup>2</sup>             | 73.0 (60.0, 88.0)      | 65.0 (54.0, 83.0)                  | 64.6 (53.0, 80.0)                      | 65.0 (54.8, 82.0)           | <0.001  |
| Log of eGFR, mL/min/1.73 m <sup>2</sup>      | 4.3 (4.1 4.5)          | 4.2 (4.0 4.4)                      | 4.2 (4.0 4.4)                          | 4.2 (4.0 4.4)               | <0.001  |
| Serum creatinine, mg/dL                      | 0.98 (0.82, 1.13)      | 1.06 (0.88, 1.26)                  | 1.06 (0.90, 1.30)                      | 1.05 (0.85, 1.24)           | <0.001  |
| Log of creatinine, mg/dL                     | -0.02 (-0.20 0.12)     | 0.06 (-0.13 0.23)                  | 0.06 (-0.11 0.26)                      | 0.05 (-0.16 0.22)           | <0.001  |
| History of vascular disease                  | 13515 (99.5%)          | 525 (99.1%)                        | 336 (99.4%)                            | 214 (99.1%)                 | 0.319   |
| History of CAD                               | 10054 (74.0%)          | 406 (76.6%)                        | 253 (74.9%)                            | 150 (69.4%)                 | 0.229   |
| Cerebrovascular disease                      | 3274 (24.1%)           | 161 (30.4%)                        | 87 (25.7%)                             | 66 (30.6%)                  | 0.001   |
| Peripheral artery disease                    | 2219 (16.3%)           | 91 (17.2%)                         | 77 (22.8%)                             | 46 (21.3%)                  | 0.003   |
| Prior myocardial infarction                  | 5739 (42.2%)           | 270 (50.9%)                        | 149 (44.1%)                            | 97 (44.9%)                  | <0.001  |
| Prior CABG                                   | 3376 (24.8%)           | 147 (27.7%)                        | 93 (27.5%)                             | 48 (22.2%)                  | 0.223   |
| Prior congestive heart failure               | 2295 (16.9%)           | 187 (35.3%)                        | 95 (28.1%)                             | 66 (30.6%)                  | <0.001  |
| History of hypertension                      | 11675 (85.9%)          | 472 (89.1%)                        | 307 (90.8%)                            | 194 (89.8%)                 | 0.005   |
| NYHA classification at baseline              |                        |                                    |                                        |                             | <0.001  |
| I                                            | 477 (20.8%)            | 32 (17.1%)                         | 18 (18.9%)                             | 8 (12.1%)                   |         |
| II                                           | 1159 (50.5%)           | 83 (44.4%)                         | 41 (43.2%)                             | 29 (43.9%)                  |         |
| III                                          | 301 (13.1%)            | 37 (19.8%)                         | 12 (12.6%)                             | 10 (15.2%)                  |         |
| IV                                           | 6 (0.3%)               | 3 (1.6%)                           | 0 (0.0%)                               | 4 (6.1%)                    |         |
| Not available                                | 352 (15.3%)            | 32 (17.1%)                         | 24 (25.3%)                             | 15 (22.7%)                  |         |
| Systolic BP, mmHg                            | 134 (124, 145)         | 132 (121, 147)                     | 134 (125, 147)                         | 135 (123, 145)              | 0.947   |
| Diastolic BP, mmHg                           | 79 (70, 84)            | 79 (70, 84)                        | 75 (68, 82)                            | 78 (70, 85)                 | <0.001  |
| Baseline weight, kg                          | 83 (72, 97)            | 82 (69, 96)                        | 83 (70, 94)                            | 78 (66, 93)                 | 0.001   |
| Baseline BMI, kg/m <sup>2</sup>              | 29.6 (26.3, 33.3)      | 29.0 (25.5, 33.2)                  | 29.0 (25.8, 32.8)                      | 28.4 (25.8, 32.5)           | <0.001  |
| Smoking history                              |                        |                                    |                                        |                             | 0.047   |
| Never                                        | 6634 (48.8%)           | 269 (50.8%)                        | 136 (40.2%)                            | 110 (50.9%)                 |         |
| Current                                      | 1550 (11.4%)           | 65 (12.3%)                         | 42 (12.4%)                             | 21 (9.7%)                   |         |
| Former                                       | 5403 (39.8%)           | 196 (37.0%)                        | 160 (47.3%)                            | 85 (39.4%)                  |         |
| <b>Antihyperglycemic Therapies</b>           |                        |                                    |                                        |                             |         |
| Metformin                                    | 11174 (82.2%)          | 408 (77.0%)                        | 234 (69.2%)                            | 150 (69.4%)                 | <0.001  |
| Sulfonylurea                                 | 6125 (45.1%)           | 268 (50.6%)                        | 147 (43.5%)                            | 105 (48.6%)                 | 0.055   |
| Pioglitazone/thiazolidinedione               | 370 (2.7%)             | 11 (2.1%)                          | 8 (2.4%)                               | 7 (3.2%)                    | 0.753   |
| Insulin                                      | 3106 (22.9%)           | 132 (24.9%)                        | 111 (32.8%)                            | 59 (27.3%)                  | <0.001  |
| <b>Cardiovascular Medications</b>            |                        |                                    |                                        |                             |         |
| Statins                                      | 10914 (80.3%)          | 395 (74.5%)                        | 259 (76.6%)                            | 151 (69.9%)                 | <0.001  |
| Aspirin                                      | 10736 (79.0%)          | 375 (70.8%)                        | 249 (73.7%)                            | 158 (73.1%)                 | <0.001  |
| ACE inhibitors/angiotensin receptor blockers | 10694 (78.7%)          | 429 (80.9%)                        | 265 (78.4%)                            | 167 (77.3%)                 | 0.052   |
| Beta blockers                                | 8613 (63.4%)           | 356 (67.2%)                        | 213 (63.0%)                            | 140 (64.8%)                 | 0.343   |
| Diuretics                                    | 5445 (40.1%)           | 310 (58.5%)                        | 151 (44.7%)                            | 114 (52.8%)                 | <0.001  |

Data are median (IQR) or n (%). CABG coronary artery bypass graft surgery; CAD coronary artery disease; NYHA New York Heart Association; BP blood pressure; eGFR estimated glomerular filtration rate; ACE angiotensin-converting enzyme.

# SUPPLEMENTARY DATA

**Supplementary Table 3. Multivariable risk factors associated with cause-specific mortality (Cox proportional hazards model, multivariate analysis)**

| Risk factor                                                     | HR with 95% CI    | P-value  |
|-----------------------------------------------------------------|-------------------|----------|
| <b>Sudden death</b>                                             |                   |          |
| eGFR per log <sub>10</sub> (mL/min/1.73 m <sup>2</sup> ) higher | 0.33 (0.18-0.58)  | 0.0001   |
| Asymptomatic (no CHF) vs. NYHA I                                | 0.40 (0.22-0.74)  | 0.0036   |
| NYHA II vs. NYHA I                                              | 0.93 (0.46-1.88)  | 0.8338   |
| NYHA III vs NYHA I                                              | 1.42 (0.59-3.45)  | 0.4321   |
| NYHA IV vs. NYHA I                                              | 5.43 (1.16-25.5)  | 0.0318   |
| History of PCI                                                  | 0.61 (0.43-0.87)  | 0.0066   |
| Female vs. male                                                 | 0.65 (0.44-0.95)  | 0.0265   |
| HbA <sub>1c</sub> (%), per 1% increase                          | 1.41 (1.02-1.96)  | 0.0389   |
| <b>Heart failure death</b>                                      |                   |          |
| Age, per 5-year increase                                        | 1.39 (1.17-1.64)  | <0.0001  |
| Prior MI                                                        | 2.28 (1.33-3.89)  | 0.0027   |
| Asymptomatic (no CHF) vs. NYHA I                                | 0.29 (0.12-0.70)  | 0.0057   |
| NYHA II vs. NYHA I                                              | 0.85 (0.31-2.34)  | 0.7505   |
| NYHA III vs NYHA I                                              | 1.50 (0.51-4.45)  | 0.4612   |
| NYHA IV vs. NYHA I                                              | 5.88 (0.68-50.62) | 0.1070   |
| eGFR per log <sub>10</sub> (mL/min/1.73 m <sup>2</sup> ) higher | 0.33 (0.13-0.80)  | 0.0142   |
| Systolic BP ≤ 135, per 5-mmHg increase                          | 0.87 (0.77-0.98)  | 0.0211   |
| <b>Acute MI or stroke death</b>                                 |                   |          |
| Age, per 5-year increase                                        | 1.26 (1.12-1.43)  | 0.0002   |
| History of cerebrovascular disease                              | 1.80 (1.23-2.63)  | 0.0025   |
| Systolic BP > 135, per 5-mmHg increase                          | 1.11 (1.07-1.43)  | 0.004    |
| Asymptomatic (no CHF) vs. NYHA I                                | 0.47 (0.22-1.00)  | 0.0486   |
| NYHA II vs. NYHA I                                              | 0.96 (0.40-2.31)  | 0.9287   |
| NYHA III vs NYHA I                                              | 2.19 (0.86-5.58)  | 0.0989   |
| NYHA IV vs. NYHA I                                              | Not estimable     | Not est. |
| <b>Presumed or other cardiovascular deaths</b>                  |                   |          |
| Age, per 5-year increase                                        | 1.15 (1.06-1.26)  | 0.0011   |
| History of PCI                                                  | 0.66 (0.49-0.91)  | 0.0102   |
| History of cerebrovascular disease                              | 1.35 (1.00-1.82)  | 0.0502   |
| <b>Unknown causes of death</b>                                  |                   |          |
| Age, per 5-year increase                                        | 1.28 (1.17-1.40)  | <0.0001  |
| NYHA IV vs. NYHA I                                              | 16.48 (4.64-58.5) | <0.0001  |
| NYHA III vs NYHA I                                              | 1.94 (0.78-4.84)  | 0.1556   |
| NYHA II vs. NYHA I                                              | 1.57 (0.74-3.35)  | 0.2413   |
| Asymptomatic (no CHF) vs. NYHA I                                | 0.71 (0.36-1.39)  | 0.3158   |
| Weight ≤ 90kg, per 5-kg increase                                | 0.87 (0.82-0.93)  | <0.0001  |
| Female vs. male                                                 | 0.64 (0.47-0.89)  | 0.0071   |
| eGFR per log <sub>10</sub> (mL/min/1.73 m <sup>2</sup> ) higher | 0.55 (0.34-0.91)  | 0.0192   |

MI myocardial infarction; CHF congestive heart failure; NYHA New York Heart Association; eGFR estimated glomerular filtration rate; PCI percutaneous coronary intervention; BP blood pressure. Other variables in the heart failure death model include: Systolic BP > 135, per 5-mmHg increase (HR 0.99; 95% CI 0.86-1.13; p=0.85). Other variables in the acute MI/stroke death model include: Log of eGFR (mL/min/1.73 m<sup>2</sup>) (HR 0.53; 95% CI 0.27-1.03; p=0.059); Systolic BP ≤ 135, per 5-mmHg increase (HR 0.94; 95% CI 0.71-1.10; p=0.28). Other variables in the unknown causes of death model include Weight > 90 kg, per 5-kg increase (HR 1.01; 95% CI 0.86-1.19; p=0.88)

# SUPPLEMENTARY DATA

**Supplementary Table 4. Sensitivity analysis of risk factors associated with cardiovascular death including unknown deaths**

| Risk factor                                                     | HR (95% CI)      | P-Value |
|-----------------------------------------------------------------|------------------|---------|
| Age, per 5-year increase                                        | 1.24 (1.18-1.30) | <0.0001 |
| History of cerebrovascular disease                              | 1.28 (1.09-1.52) | 0.0033  |
| Prior myocardial infarction                                     | 1.37 (1.17-1.60) | 0.0001  |
| Asymptomatic (no CHF) vs. NYHA I                                | 0.60 (0.44-0.83) | 0.0021  |
| NYHA II vs. NYHA I                                              | 1.20 (0.83-1.72) | 0.3372  |
| NYHA III vs. NYHA I                                             | 1.59 (1.03-2.44) | 0.0356  |
| NYHA IV vs. NYHA I                                              | 5.46 (2.32-12.9) | 0.0001  |
| History of PCI                                                  | 0.65 (0.55-0.76) | <0.0001 |
| White vs. other race                                            | 0.53 (0.38-0.76) | 0.0004  |
| Black vs. other race                                            | 0.70 (0.40-1.21) | 0.2039  |
| Asian vs. other race                                            | 0.74 (0.49-1.13) | 0.1662  |
| Latin America vs. North America                                 | 1.22 (0.85-1.74) | 0.2872  |
| Asia Pacific/Other vs. North America                            | 1.25 (0.93-1.67) | 0.1447  |
| Western Europe vs. North America                                | 1.06 (0.78-1.44) | 0.7069  |
| Eastern Europe vs. North America                                | 1.61 (1.24-2.09) | 0.0003  |
| Female vs. male                                                 | 0.69 (0.58-0.82) | <0.0001 |
| eGFR per log <sub>10</sub> (mL/min/1.73 m <sup>2</sup> ) higher | 0.50 (0.38-0.65) | <0.0001 |
| qHbA <sub>1c</sub> (%), per 1% increase                         | 1.28 (1.10-1.49) | 0.0013  |
| Systolic BP ≤ 135, per 5-mmHg increase                          | 0.93 (0.89-0.97) | 0.0004  |
| Systolic BP > 135, per 5-mmHg increase                          | 1.03 (0.99-1.06) | 0.1387  |

**Supplementary Table 5. Fine-Gray Model for cardiovascular death (competing risk adjusted for non-CV and unknown death)**

| Risk factor                                                     | SHR* (95% CI)    | P-Value |
|-----------------------------------------------------------------|------------------|---------|
| Age, per 5-year increase                                        | 1.17 (1.10-1.25) | <0.0001 |
| History of cerebrovascular disease                              | 1.29 (1.06-1.58) | 0.0122  |
| Prior myocardial infarction                                     | 1.45 (1.20-1.75) | 0.0001  |
| Asymptomatic (no CHF) vs. NYHA I                                | 0.54 (0.37-0.78) | 0.0010  |
| NYHA II vs. NYHA I                                              | 1.14 (0.76-1.71) | 0.5147  |
| NYHA III vs. NYHA I                                             | 1.61 (1.01-2.58) | 0.0467  |
| NYHA IV vs. NYHA I                                              | 2.96 (0.90-9.75) | 0.0747  |
| History of PCI                                                  | 0.63 (0.52-0.77) | <0.0001 |
| Latin America vs. North America                                 | 1.65 (1.16-2.37) | 0.0060  |
| Asia Pacific/Other vs. North America                            | 1.32 (0.98-1.79) | 0.0696  |
| Western Europe vs. North America                                | 1.02 (0.72-1.46) | 0.8939  |
| Eastern Europe vs. North America                                | 1.49 (1.10-2.03) | 0.0103  |
| Female vs. male                                                 | 0.63 (0.51-0.78) | <0.0001 |
| eGFR per log <sub>10</sub> (mL/min/1.73 m <sup>2</sup> ) higher | 0.49 (0.35-0.69) | <0.0001 |
| qHbA <sub>1c</sub> (%), per 1% increase                         | 1.28 (1.07-1.53) | 0.0076  |
| Systolic BP ≤ 135, per 5-mmHg increase                          | 0.93 (0.88-0.97) | 0.0028  |
| Systolic BP > 135, per 5-mmHg increase                          | 1.04 (1.00-1.08) | 0.0502  |
| Baseline weight ≤ 90 kg, per 5-kg increase                      | 0.92 (0.87-0.96) | 0.0007  |
| Baseline weight > 90 kg, per 5-kg increase                      | 1.04 (0.99-1.08) | 0.1103  |

\*Sub-distribution hazard ratio.

## SUPPLEMENTARY DATA

**Supplementary Figure 1. Cumulative incidence of all-cause, cardiovascular and non-cardiovascular mortality (cardiovascular death includes unknown causes of death)**

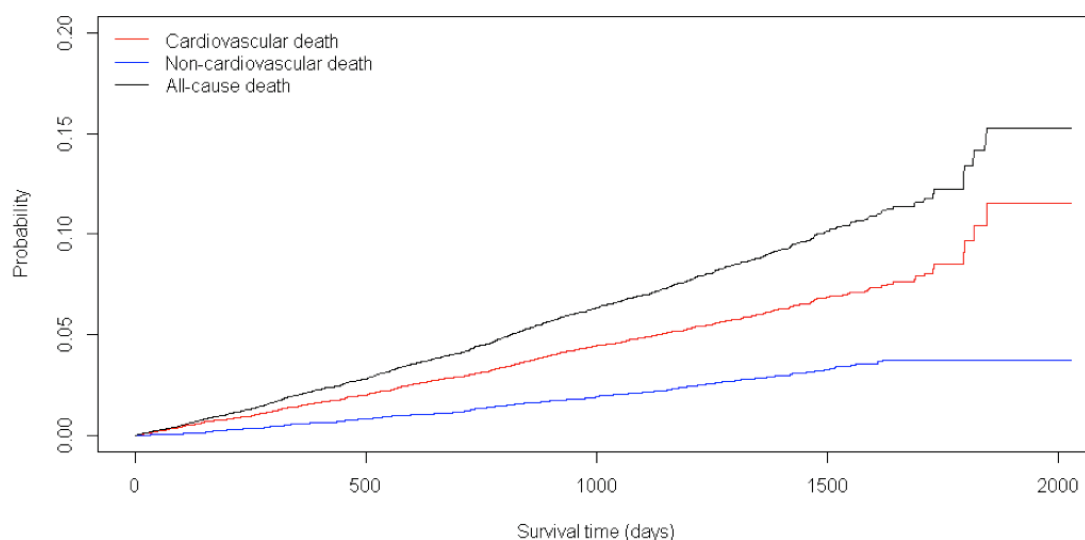

**Supplementary Figure 2. Cumulative incidence of all-cause, cardiovascular, non-cardiovascular, and unknown mortality**

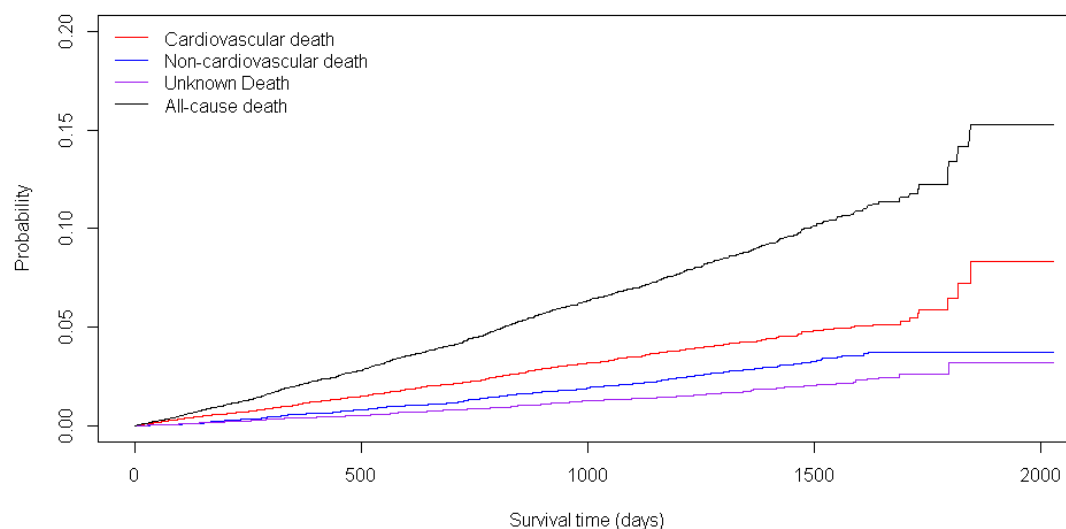

The first table below lists the baseline covariates that were used in the stepwise selection as possible risk factors for each endpoint analysis. Bolded are covariates with missing data. The PROC MI model specifications and Fully Conditional Specification method that were utilized are described. The final table reflects the unique missing data patterns from our dataset for the covariates used in the endpoint analyses; this provides the missing data pattern as well as its frequency within the dataset.

## SUPPLEMENTARY DATA

| <b>Characteristic</b>                                                               | <b>All Patients<br/>(N=14671)</b> |
|-------------------------------------------------------------------------------------|-----------------------------------|
| <b>Demographics</b>                                                                 |                                   |
| <b>Age, median (25th percentile, 75th percentile), n</b>                            | 65 (60, 71), 14351                |
| Female                                                                              | 4297/14671 (29%)                  |
| <b>Race Groups</b>                                                                  |                                   |
| White                                                                               | 9957/14671 (68%)                  |
| Black                                                                               | 447/14671 (3%)                    |
| Asian                                                                               | 3265/14671 (22%)                  |
| Other                                                                               | 1002/14671 (7%)                   |
| Not Hispanic or Latino                                                              | 12873/14671 (88%)                 |
| Hispanic or Latino                                                                  | 1798/14671 (12%)                  |
| <b>Region Groups</b>                                                                |                                   |
| Latin America                                                                       | 1471/14671 (10%)                  |
| Asia Pacific/Other                                                                  | 4565/14671 (31%)                  |
| Western Europe                                                                      | 2076/14671 (14%)                  |
| Eastern Europe                                                                      | 3965/14671 (27%)                  |
| North America                                                                       | 2594/14671 (18%)                  |
| <b>Medical History and Baseline Labs</b>                                            |                                   |
| <b>Duration of Diabetes in yrs, median (25th percentile, 75th percentile), n</b>    | 10.0 (5.0, 16.0), 14659           |
| <b>Baseline HbA1c (mmol/mol), median (25th percentile, 75th percentile), n</b>      | 55 (51, 60), 14666                |
| <b>eGFR mL/min/1.73cm<sup>2</sup>, median (25th percentile, 75th percentile), n</b> | 73.0 (60.0 88.0), 14528           |
| <b>Hemoglobin, median (25th percentile, 75th percentile), n</b>                     | 137.00 (127.00 147.00), 9623      |
| Prior Cardiovascular Disease                                                        | 10863/14671 (74%)                 |
| History of CAD                                                                      | 10863/14671 (74%)                 |
| Cerebrovascular Disease                                                             | 3588/14671 (24%)                  |
| Peripheral Artery Disease                                                           | 2433/14671 (17%)                  |
| Prior Myocardial Infarction                                                         | 6255/14671 (43%)                  |
| Prior CABG                                                                          | 3664/14671 (25%)                  |
| <b>Prior PCI</b>                                                                    | 5714/14468 (39%)                  |
| Prior Congestive Heart Failure                                                      | 2643/14671 (18%)                  |
| History of Hypertension                                                             | 12648/14671 (86%)                 |
| <b>NYHA Classification at Baseline</b>                                              |                                   |
| I                                                                                   | 535/2643 (20%)                    |
| II                                                                                  | 1312/2643 (50%)                   |
| III                                                                                 | 360/2643 (14%)                    |
| IV                                                                                  | 13/2643 (0%)                      |
| Not Available                                                                       | 423/2643 (16%)                    |
| <b>Systolic BP mmHg, median (25th percentile, 75th percentile), n</b>               | 134 (124 145), 14629              |
| <b>Diastolic BP mmHg, median (25th percentile, 75th percentile), n</b>              | 79 (70 84), 14629                 |
| <b>Baseline Weight kg, median (25th percentile, 75th percentile), n</b>             | 83 (71 96), 14599                 |
| <b>Baseline BMI, median (25th percentile, 75th percentile), n</b>                   | 29.5 (26.3 33.3), 14534           |
| <b>Smoking History</b>                                                              |                                   |
| Never                                                                               | 7149/14671 (49%)                  |
| Current                                                                             | 1678/14671 (11%)                  |
| Former                                                                              | 5844/14671 (40%)                  |

## PROC MI Model Specifications

|                                         |              |
|-----------------------------------------|--------------|
| <b>Data Set</b>                         | WORK.FORIMP2 |
| <b>Method</b>                           | FCS          |
| <b>Number of Imputations</b>            | 25           |
| <b>Number of Burn-in Iterations</b>     | 20           |
| <b>Seed for random number generator</b> | 16218        |

# SUPPLEMENTARY DATA

## FCS Model Specification

| Method                   | Imputed Variables                                                                   |
|--------------------------|-------------------------------------------------------------------------------------|
| Regression               | qhba1c DIABDUR SBPBL DBPBL WGHTBL blgfr AGEIMP blhgb                                |
| Logistic<br>Regression   | PCIHXFN NYHAGR1N                                                                    |
| Discriminant<br>Function | female RACEGR1N REGGR1N hispanic MIHXFN CABHXFN SMOKGR1N<br>CBVHXFN PADHXFN CHFHXFN |

# SUPPLEMENTARY DATA

## Missing Data Patterns

| Group | Covariates |                      |             |              |        |      |                |     |            |                     | Number of Cases |
|-------|------------|----------------------|-------------|--------------|--------|------|----------------|-----|------------|---------------------|-----------------|
|       | HbA1c      | Duration of Diabetes | Systolic BP | Diastolic BP | Weight | eGFR | History of PCI | Age | Hemoglobin | NYHA Classification |                 |
| 1     | X          | X                    | X           | X            | X      | X    | X              | X   | X          | .                   | 2981            |
| 2     | X          | X                    | X           | X            | X      | X    | X              | X   | .          | .                   | 911             |
| 3     | X          | X                    | X           | X            | X      | X    | X              | X   | X          | X                   | 317             |
| 4     | X          | X                    | X           | X            | X      | X    | X              | X   | .          | X                   | 65              |
| 5     | X          | X                    | X           | X            | X      | X    | X              | .   | X          | X                   | 39              |
| 6     | X          | X                    | X           | X            | X      | X    | .              | X   | X          | .                   | 35              |
| 7     | X          | X                    | X           | X            | X      | X    | X              | .   | X          | .                   | 18              |
| 8     | X          | X                    | X           | X            | X      | X    | X              | .   | .          | .                   | 11              |
| 9     | X          | X                    | X           | X            | X      | X    | .              | X   | .          | .                   | 10              |
| 10    | X          | X                    | X           | X            | X      | .    | X              | X   | X          | .                   | 10              |
| 11    | X          | X                    | X           | X            | X      | X    | X              | .   | .          | X                   | 7               |
| 12    | X          | X                    | X           | X            | X      | .    | X              | X   | .          | X                   | 3               |
| 13    | X          | X                    | X           | X            | X      | .    | X              | X   | .          | .                   | 3               |
| 14    | X          | X                    | X           | X            | .      | X    | X              | X   | X          | .                   | 2               |
| 15    | X          | X                    | X           | X            | X      | X    | .              | X   | .          | X                   | 1               |
| 16    | X          | X                    | X           | X            | X      | X    | .              | .   | .          | .                   | 1               |
| 17    | X          | X                    | X           | X            | X      | .    | X              | X   | X          | X                   | 1               |
| 18    | X          | X                    | X           | X            | .      | X    | X              | X   | .          | .                   | 1               |
| 19    | .          | X                    | X           | X            | X      | X    | X              | X   | X          | .                   | 1               |
